# Supplementary material for: RNA-binding protein PCBP2 regulates pancreatic β cell function and adaptation to glucose
Source: JCI journal article supplement (doi:10.1172/jci172436), 2024-06-16

## Full unedited blots for Figure 1A

PCBP2

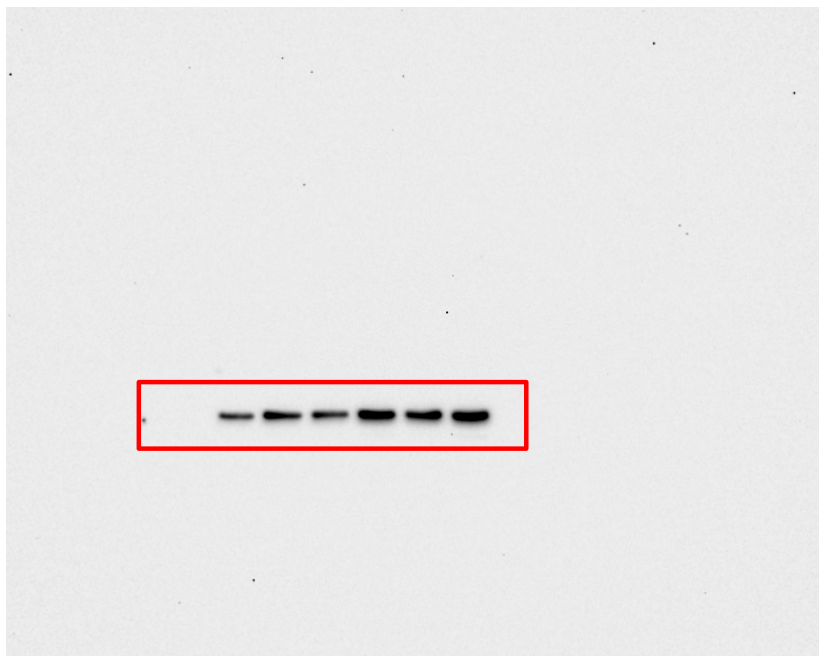

RAN

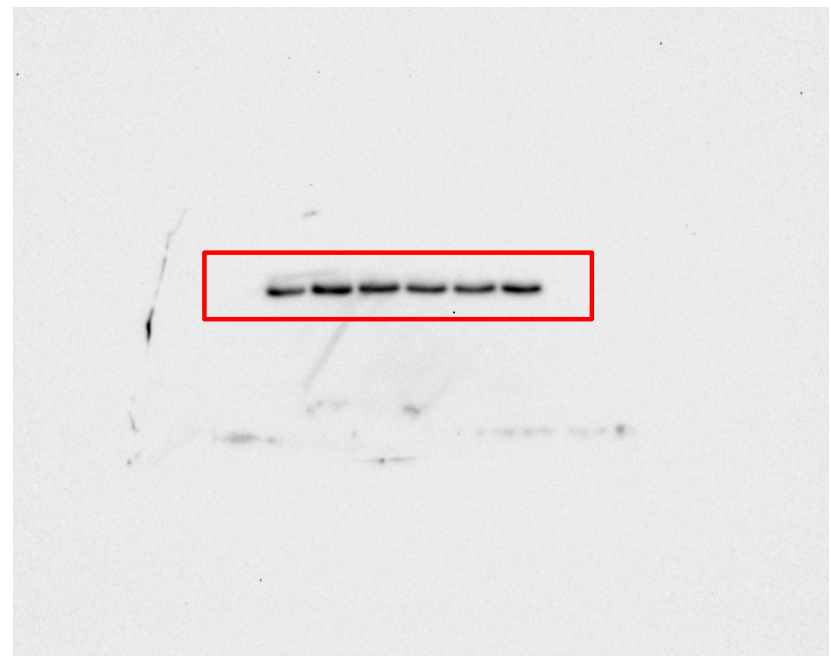

# Full unedited blots for Figure 1B

PCBP2

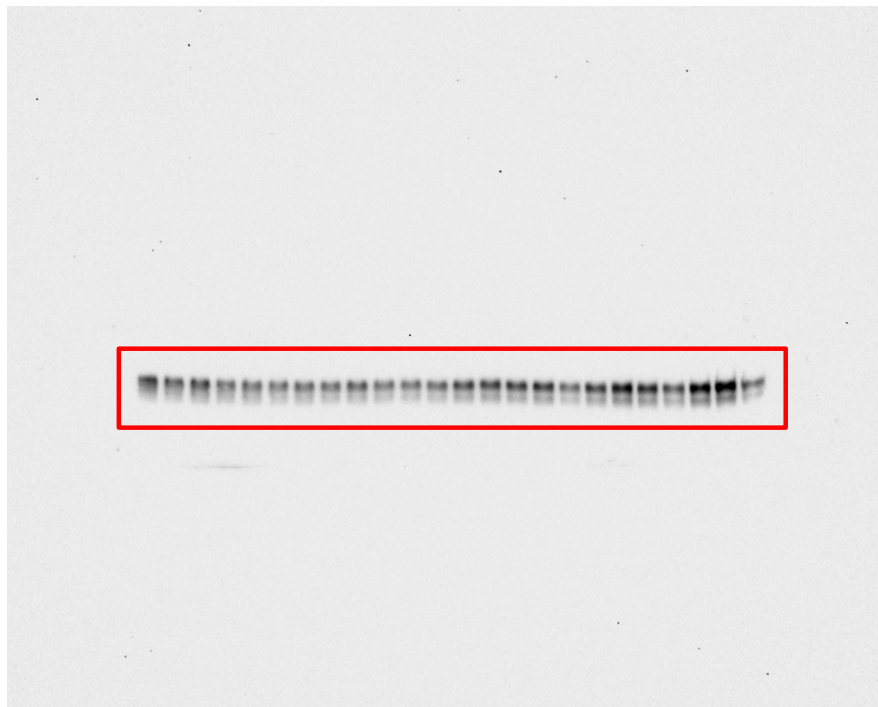

RAN

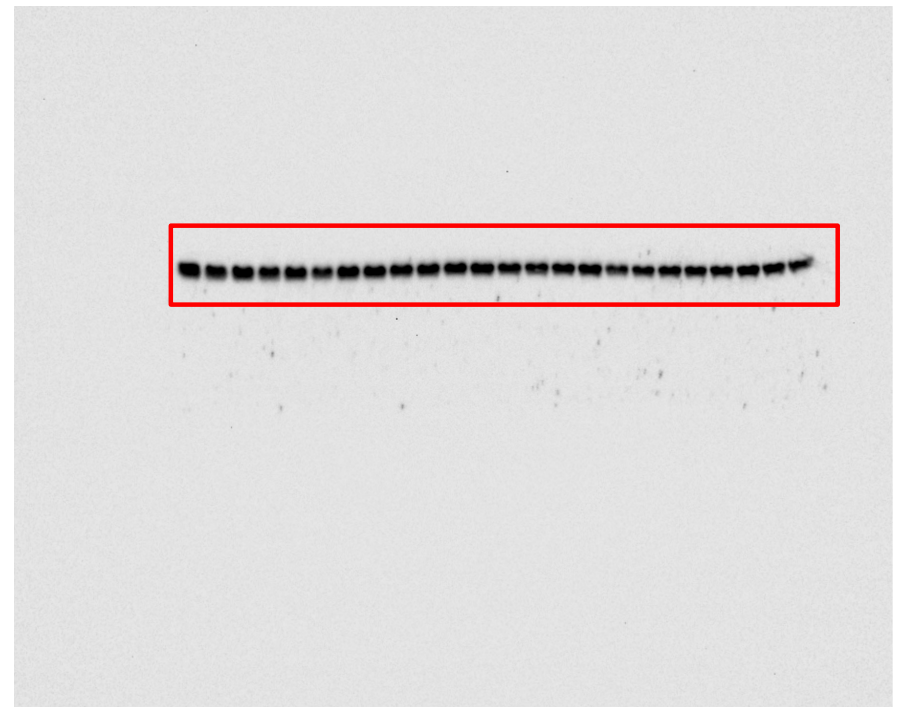

# Full unedited blots for Figure 1E

PCBP2

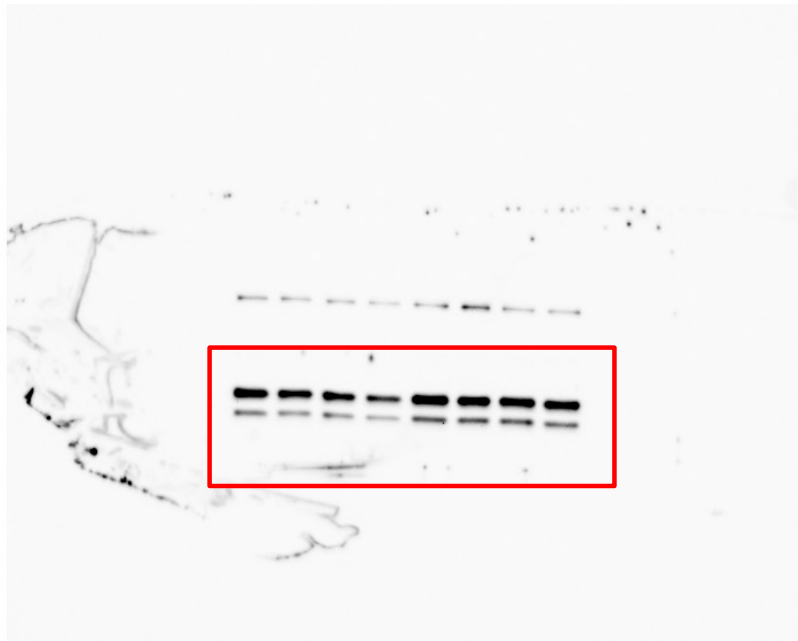

GAPDH

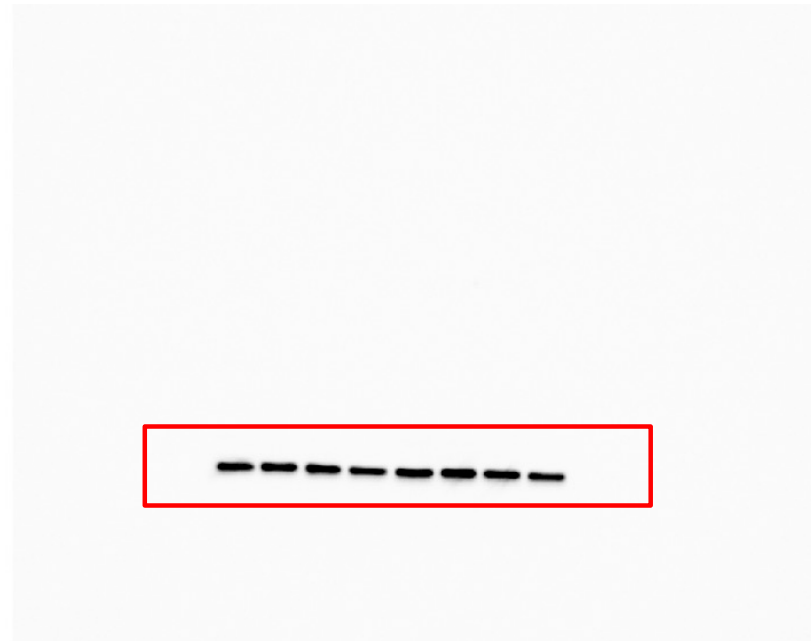

# Full unedited blots for Supplemental Figure 1A

PCBP2

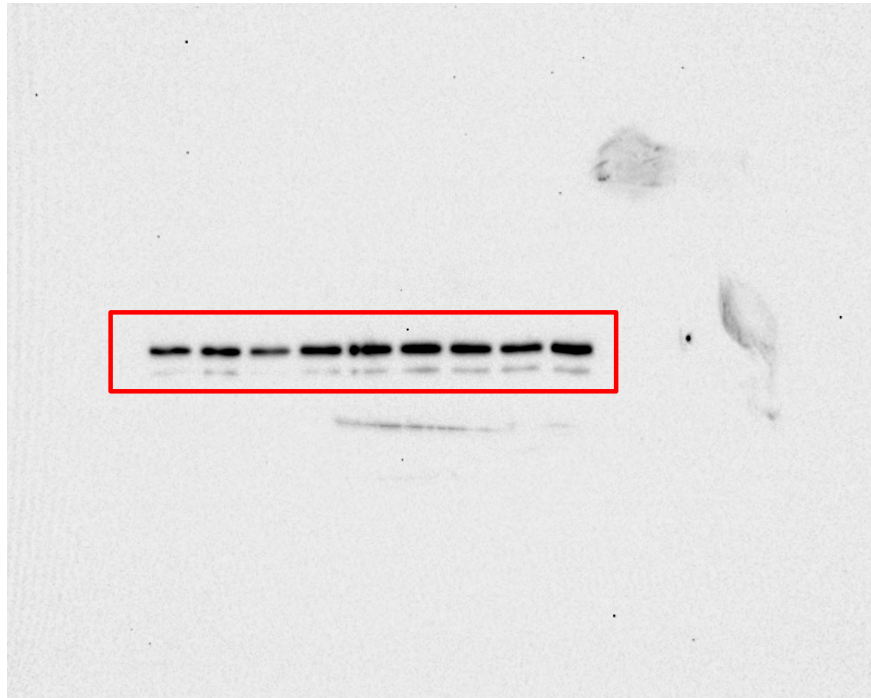

RAN

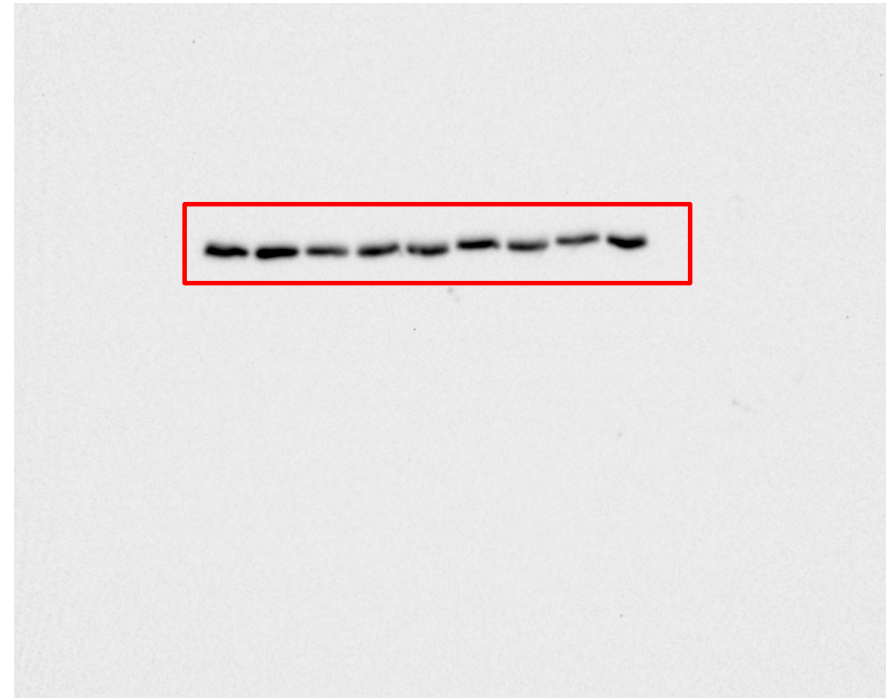

# Full unedited blots for Supplemental Figure 1B

PCBP2

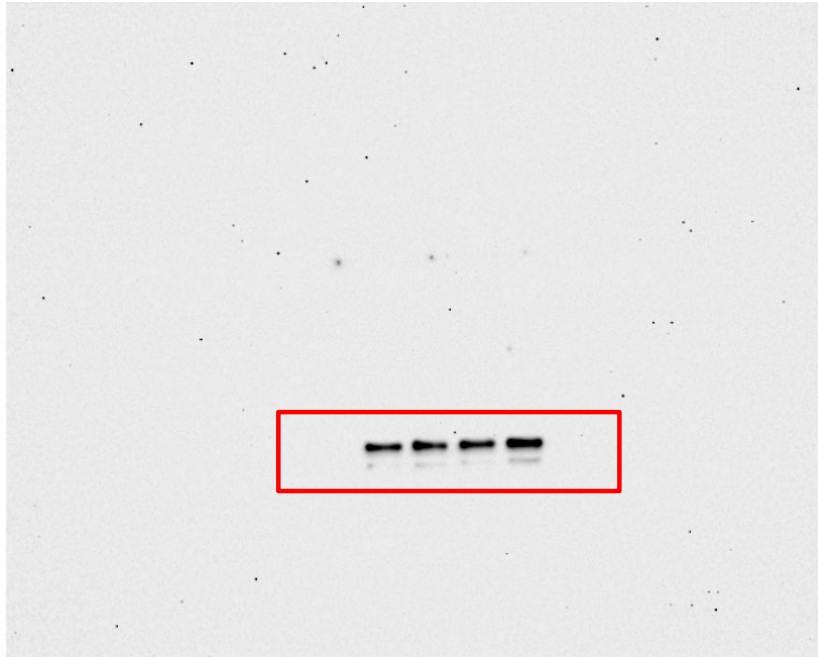

RAN

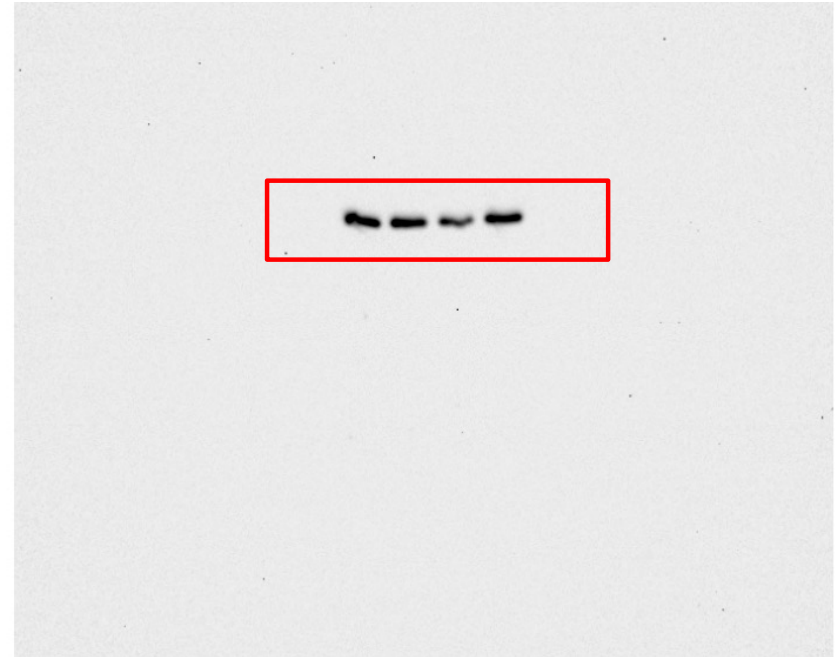

# Full unedited blots for Supplemental Figure 4A

PCBP2

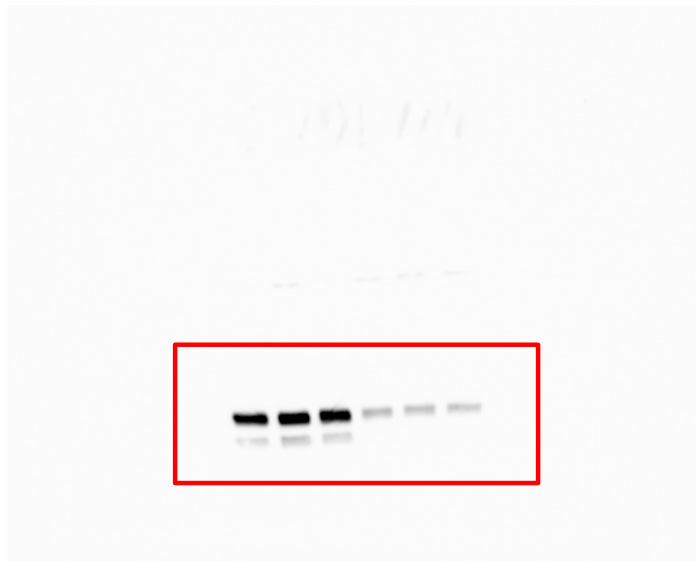

RAN

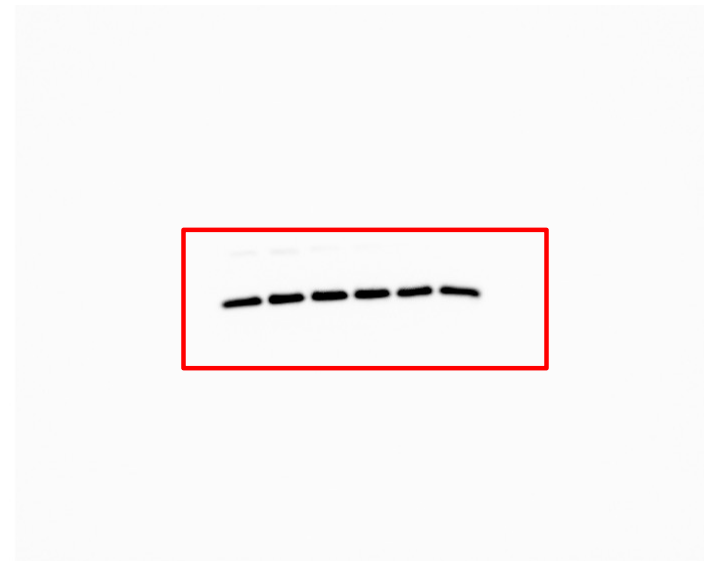

## Full unedited blots for Figure 8A

PCBP2

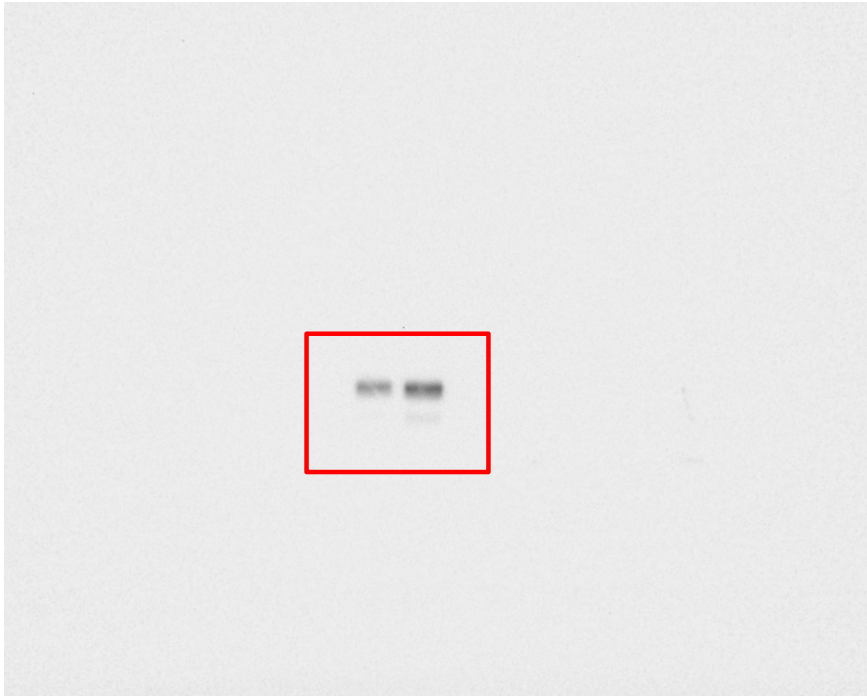

RAN

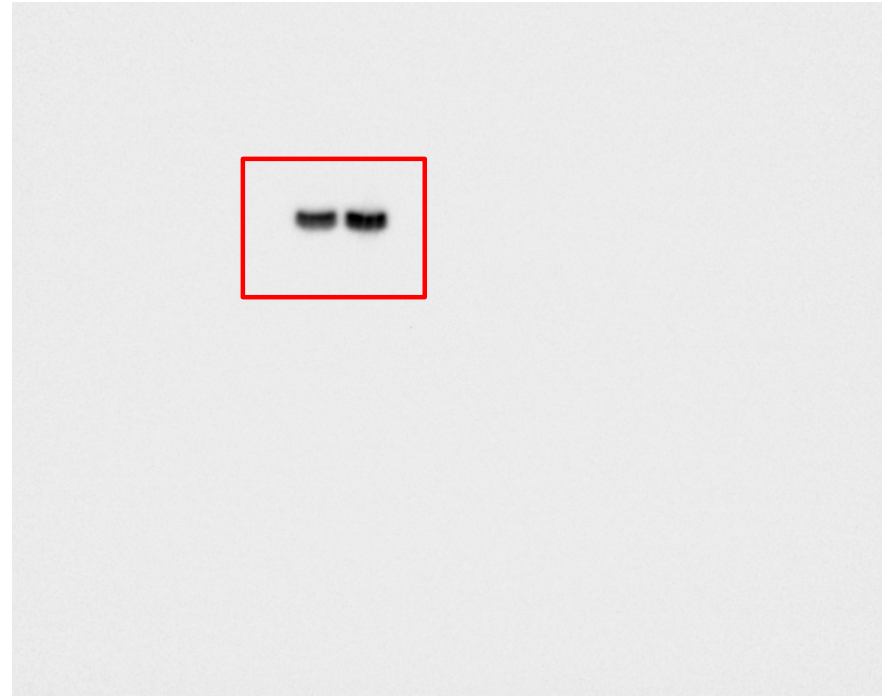



## Full unedited blots for Figure 8B

PCBP2

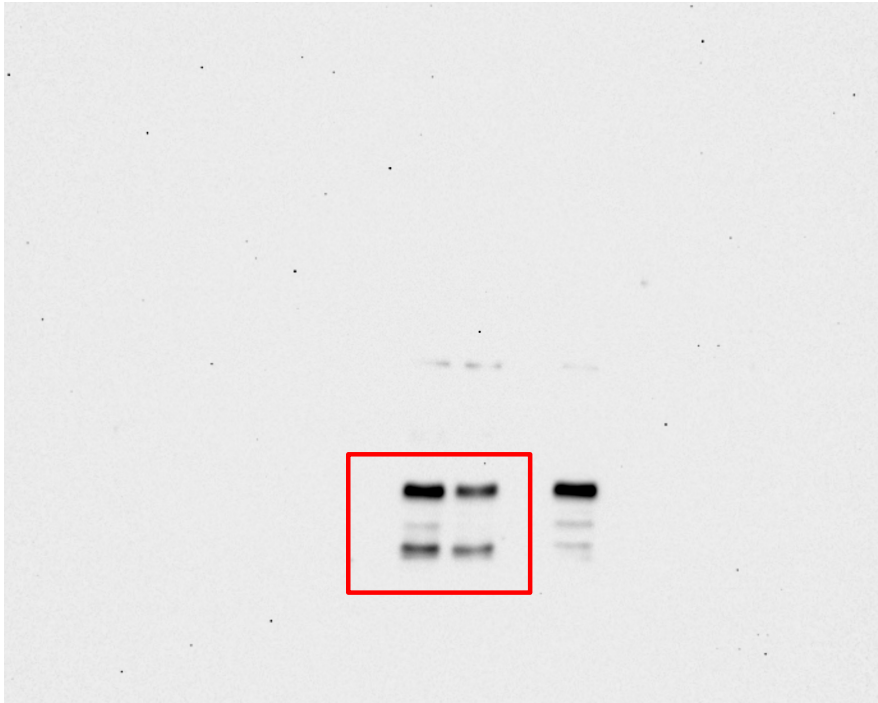

RAN

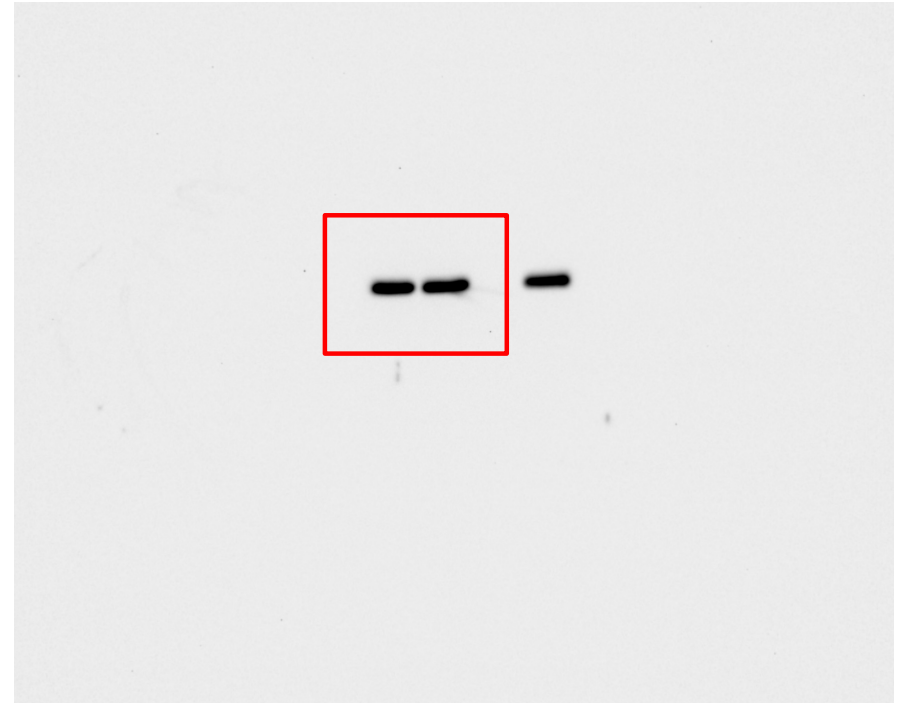



# Full unedited blots for Supplemental Figure 14

PCBP2

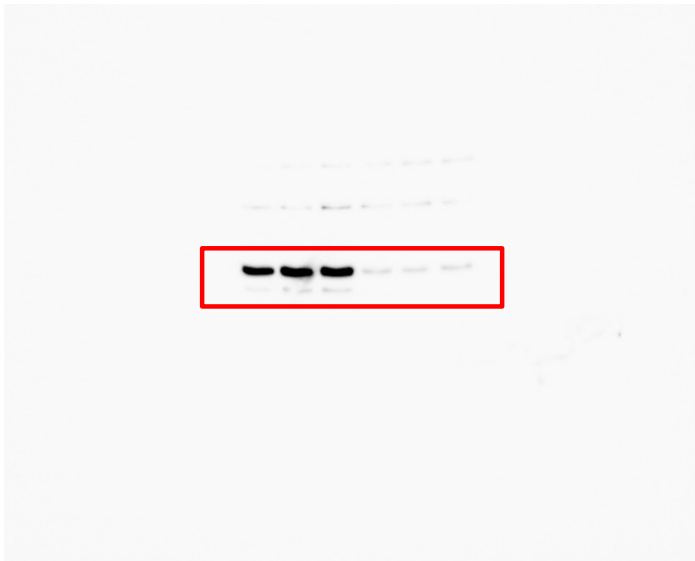

RAN

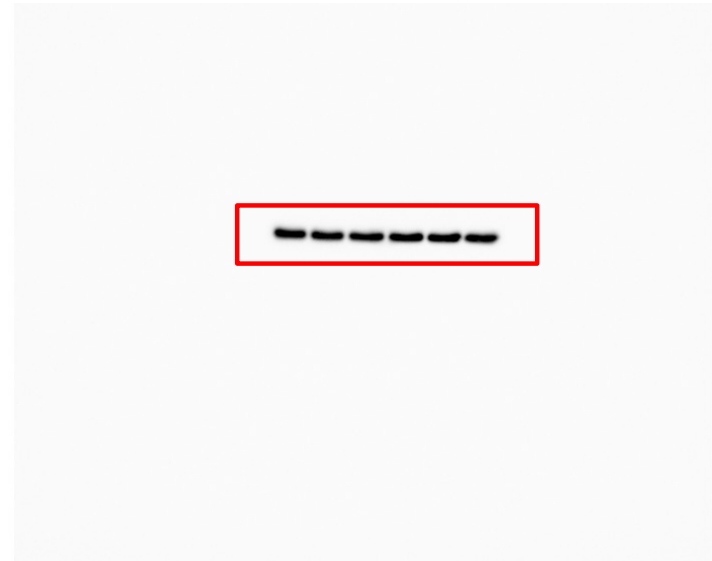

Supplement: sd2 [file 2]
